# Supplementary material for: Assessing physical access to healthy food across United Kingdom: A systematic review of measures and findings
Source: PubMed Central journal article supplement (PMC8976549; doi:10.1002/osp4.563), 2021-09-15

FIGURE S2. Classification of measures

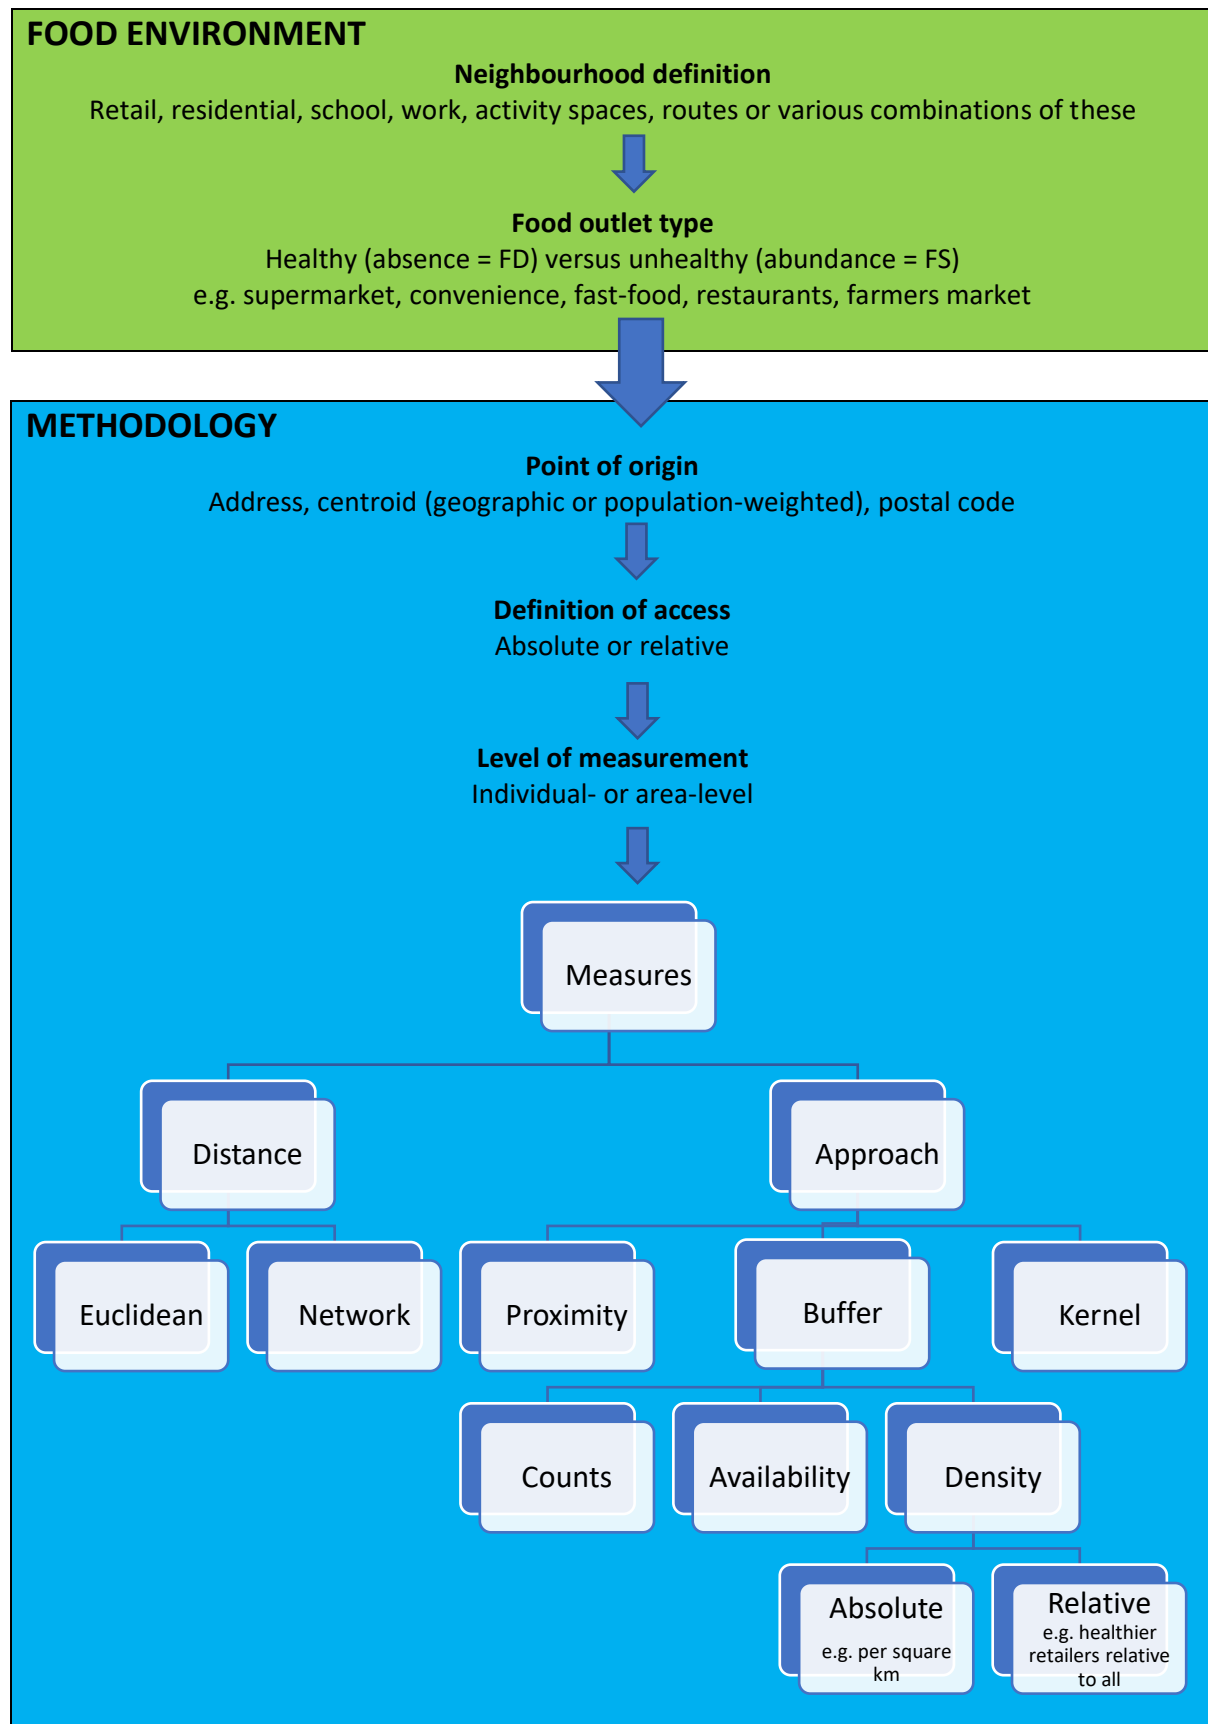

Supplement: OSP4-8-233-s003.pdf [file OSP4-8-233-s003.pdf]
